# Supplementary material
Source: PubMed Central journal article supplement (PMC5591766)
Supplement: NIHMS862477-supplement-supplement_1.pdf [file NIHMS862477-supplement-supplement_1.pdf]

## 1 METHODS

### 2 Human Subjects

3 Subjects were recruited from the Virginia Mason Medical Center Allergy Clinic and Benaroya  
4 Research Institute with informed consent and institutional review board approval (IRB title  
5 “Allergen and T-cell reagent resources for the study of allergic diseases”; approval number  
6 IRB7109). A total of 26 subjects with a documented record of milk allergy and a positive  
7 ImmunoCAP score for milk extract ( $>0.35$  kU/L) (Phadia AB, Uppsala, Sweden), were recruited  
8 for this study. All patients had onset of cow milk allergy in infancy, typically with first known  
9 exposure to cow milk with symptoms consisting typically of urticaria and gastrointestinal  
10 discomfort and vomiting. Diagnosis of cow milk allergy was made by specific IgE testing to  
11 cow milk, either skin prick testing or serum IgE testing and history of presentation of clinical  
12 symptoms. Most recent serum cow milk specific IgE levels are shown in **Table E1**. 18 patients  
13 ( $12 > 8$ -year-old and  $6 \leq 8$ -year-old) do not tolerate any form of milk and 8 patients ( $6 > 8$ -year-  
14 old and  $2 \leq 8$ -year-old) tolerate baked form of milk protein. Patients with baked milk intolerance  
15 had either accidental ingestion- induced symptoms or failed challenge to baked milk. The 8  
16 patients tolerating baked milk had accidental ingestion of fresh milk -induced symptoms, but  
17 passed a baked milk challenge.

18 13 non-atopic and 5 atopic subjects with no clinical symptoms to milk, a negative ImmunoCAP  
19 score and HLA(Human histocompatibility leukocyte antigen)-matched were also recruited as  
20 controls for this study. The features of these subjects are shown in **Table E1**. DNA samples were  
21 HLA-typed using Dynal Unitray<sup>TM</sup> SSP Kits (Invitrogen, Carlsbad, CA) according to the  
22 manufacturer’s instructions.

23

#### 24 **Tetramer guided epitope mapping (TGEM)**

25 Peptide libraries were generated based on  $\beta$ -lactoglobulin,  $\alpha_{S1}$ -casein,  $\alpha_{S2}$ -casein,  $\beta$ -casein and  
26  $\kappa$ -casein sequences. The libraries consisted of overlapping peptides spanning the entire allergen,  
27 which were 20 amino acids in length with a 12 amino acid overlap synthesized by Mimotopes  
28 (Clayton, Australia). Peptide-loaded HLA-DR and HLA-DQ proteins were generated, as  
29 previously described<sup>(E1;E2)</sup>. The tetramer-guided epitope-mapping procedure was conducted as  
30 previously described<sup>(E3)</sup>. Briefly, PBMC from CMA subjects were stimulated for 2 weeks with  
31 pool peptides which consisted of 5 overlapping peptides spanning the entire allergen. After 2  
32 weeks, PBMC were screened with pMHC-II tetramers loaded with the pool of peptides that  
33 corresponded to the stimulated well, those with a positive signal were re-screened again but this  
34 time with pMHC-II tetramers loaded with single peptides.

35

#### 36 ***Ex-vivo* analysis of milk-specific CD4<sup>+</sup> T-cells**

37 CD154<sup>+</sup> detection assay was carried out as previously described<sup>(E4)</sup>. Briefly, for detection of  
38 CD154<sup>+</sup>-reactive T-cells, 15-35 million of freshly isolated PBMC (at  $7 \times 10^6$  cells/mL) in  
39 culture medium (RPMI 1640 (Gibco) + 10% pooled human serum + 1% PenStrep) were  
40 stimulated with 5 $\mu$ g/mL of synthesized peptide pools (at a final concentration of 47.5  $\mu$ M for  
41 Bos d 5, 60  $\mu$ M for Bos d 9, 62.5  $\mu$ M for Bos d 10, 62.5  $\mu$ M for Bos d 11 and 50  $\mu$ M for Bos d  
42 12), and 1  $\mu$ g/ml anti-CD40 (Miltenyi Biotec, Auburn, CA) for 3 hours (for frequency) and 6  
43 hours (for ICS) at 37°C. Cells were also mock stimulated with DMSO (0.05% final concentration)  
44 as negative control. After stimulation, cells were stained with PE (phycoerythrin)-conjugated

45 CD154 (Miltenyi Biotec, Auburn, CA) and labeled with anti-PE magnetic beads (Miltenyi  
46 Biotec, Auburn, CA) for 20 minutes at 4°C. A 1/100 fraction of cells was saved for analysis. The  
47 other fraction was passed through a Miltenyi magnetic column; magnetically enriched cells were  
48 next stained with a panel of antibodies of interest for 20 minutes at room temperature. After  
49 staining, cells were stained again with Via-probe<sup>+</sup> (BD Biosciences, East Rutherford, NJ) for 10  
50 minutes at 4°C before flow-cytometry. Data acquisition was performed using a FACSCanto flow  
51 cytometer and data were analyzed utilizing FlowJo (Tree Star, Ashland, Ore). Frequency was  
52 calculated as previously described for tetramer analysis <sup>(E5)</sup>. *Ex vivo* analysis with pMHC-II  
53 (Peptide/MHC class II) tetramers was carried out as previously described <sup>(E5)</sup>.

#### 54 **Intracellular cytokine staining**

55 For *ex-vivo* intracellular cytokine staining (ICS) combined with CD154 activation assay, BD GolgiStop<sup>TM</sup>  
56 was added during stimulation (BD biosciences, East Rutherford, NJ) according to the manufacturer's  
57 instructions. After 10 minutes at room temperature, cells were then fixed with fixation buffer  
58 (eBioscience, San Diego, CA) and washed twice with a permeabilization buffer (eBioscience, San Diego,  
59 CA). Cells were then stained with a panel of antibodies (eBioscience, San Diego, CA and BD biosciences,  
60 East Rutherford, NJ) directed against cytokines of interest for 20 minutes at room temperature; cells were  
61 washed and immediately analyzed in FACSCanto flow cytometer.

62

#### 63 **Statistical analysis**

64 Statistical analysis was performed using the tests indicated in the figure legends utilizing Prism  
65 5.0 software (GraphPad Software, La Jolla, California).

66

67

68 **REFERENCES**

69

70 (E1) Novak EJ, Liu AW, Nepom GT, Kwok WW. MHC class II tetramers identify peptide-specific  
71 human CD4(+) T cells proliferating in response to influenza A antigen. *J Clin Invest* 1999;  
72 104(12):R63-R67.

73 (E2) Kwok WW, Liu AW, Novak EJ, Gebe JA, Ettinger RA, Nepom GT et al. HLA-DQ tetramers  
74 identify epitope-specific T cells in peripheral blood of herpes simplex virus type 2-infected  
75 individuals: direct detection of immunodominant antigen-responsive cells. *J Immunol* 2000;  
76 164(8):4244-9.

77 (E3) Novak EJ, Liu AW, Gebe JA, Falk BA, Nepom GT, Koelle DM et al. Tetramer-guided epitope  
78 mapping: rapid identification and characterization of immunodominant CD4+ T cell epitopes  
79 from complex antigens. *J Immunol* 2001; 166(11):6665-70.

80 (E4) Archila LD, Jeong D, Pascal M, Bartra J, Juan M, Robinson D et al. Jug r 2-reactive CD4 T cells  
81 have a dominant immune role in walnut allergy. *J Allergy Clin Immunol* 2015.

82 (E5) Kwok WW, Roti M, DeLong JH, Tan V, Wambre E, James EA et al. Direct ex vivo analysis of  
83 allergen-specific CD4+ T cells. *J Allergy Clin Immunol* 2010; 125(6):1407-9.



|                 |                    |                      |                                        |                                        |
|-----------------|--------------------|----------------------|----------------------------------------|----------------------------------------|
|                 |                    |                      | 2/7 <sup>‡</sup>                       |                                        |
| <b>Bos d 11</b> | <sub>193-212</sub> | FLLYQEPVLGPVRGPFPIIV | 1/2 <sup>†</sup> ,<br>2/7 <sup>‡</sup> |                                        |
| <b>Bos d 12</b> | <sub>1-20</sub>    | AQEQNQEQPIRCEKDERFFS | 0/1 <sup>†</sup> ,<br>1/5 <sup>‡</sup> | 1/3 <sup>†</sup> ,<br>0/3 <sup>‡</sup> |
| <b>Bos d 12</b> | <sub>57-76</sub>   | LPYPYYAKPAAVRSPAQLQ  |                                        | 1/3 <sup>†</sup> ,<br>0/3 <sup>‡</sup> |
| <b>Bos d 12</b> | <sub>105-124</sub> | SFMAIPPKNQDKTEIPTIN  |                                        | 2/2 <sup>†</sup> ,<br>0/4 <sup>‡</sup> |
| <b>Bos d 12</b> | <sub>153-172</sub> | PEVIESPPEINTVQVTSTAV | 0/1 <sup>†</sup> ,<br>1/5 <sup>‡</sup> |                                        |

<sup>‡</sup>Previously identified CD4+ T-cell epitopes by Elsayed et al (Molecular Immunology, 2004).

\*Previously identified as HLA-II-restricted T-cell epitopes in [www.iedb.org](http://www.iedb.org). Epitope Bos d 5<sub>17-36</sub> (33950, 223605); Bos d 5<sub>129-148</sub> (222188); Bos d 9<sub>17-36</sub> (31145, 38207); Bos d 9<sub>105-124</sub> (74689, 51432, 34491, 70444); Bos d 9<sub>137-156</sub> (13715, 13716, 26364, 26341); Bos d 9<sub>145-164</sub> (26341, 45542, 18443); Bos d 9<sub>169-188</sub> (10, 5711, 7690).

<sup>†</sup># of responders and # of subjects tested with the designated HLA-DR or HLA-DQ with baked milk tolerance.

<sup>‡</sup># of responders and # of subjects tested with the designated HLA-DR or HLA-DQ with baked milk intolerance.

**Table E1.** HLA and allergic status of recruited subjects

| ID                                                              | Age | Sex | HLA<br>(DRB1*) | sIgE<br>milk<br>(f256)<br>kU/L | Symptoms<br>to Milk<br>ingestion | Tolerates baked<br>milk |
|-----------------------------------------------------------------|-----|-----|----------------|--------------------------------|----------------------------------|-------------------------|
| <b>Milk Allergic Adults</b>                                     |     |     |                |                                |                                  |                         |
| 1                                                               | 39  | F   | 04:01 , 07:01  | 10.3                           | I, II, III, IV, V                | No                      |
| 2                                                               | 34  | M   | 07:01 , 13:01  | 0.5                            | V , VIII                         | No                      |
| 3                                                               | 22  | F   | 04:01 , 10:01  | 41.2                           | VIII                             | No                      |
| 4                                                               | 18  | M   | 10:01 , 12:01  | 4.63                           | VIII                             | No                      |
| 5                                                               | 30  | F   | 01:01 , 09:01  | 0.53                           | VIII                             | Yes                     |
| 6                                                               | 20  | M   | 03:01 , 13:01  | 3.29                           | III, IV, V                       | No                      |
| 7                                                               | 20  | M   | 01:01 , 03:01  | 82.9                           | I, II                            | Yes                     |
| 8                                                               | 19  | M   | 07:01 , 13:01  | 41.1                           | IV, V                            | No                      |
| 9                                                               | 18  | M   | 04:01 , 12:01  | 26.1                           | VIII                             | No                      |
| <b>Milk Allergic Teenagers and Children &gt; 8 years of age</b> |     |     |                |                                |                                  |                         |
| 10                                                              | 15  | M   | 04:01 , 15:01  | 4.46                           | I, II, IV                        | No                      |
| 11                                                              | 10  | M   | 13:01 , 15:01  | 35.1                           | IV                               | Yes                     |
| 12                                                              | 10  | M   | 03:01 , 12:01  | 64.7                           | III, IV, V                       | No                      |
| 13                                                              | 13  | F   | 03:01 , 03:01  | 64.5                           | I,II                             | No                      |
| 14                                                              | 9   | M   | 03:01 , 07:01  | 22.7                           | II, IV, V                        | No                      |
| 15                                                              | 11  | M   | 07:01 , 15:01  | 12.1                           | IV, V                            | Yes                     |
| 16                                                              | 12  | F   | 01:01 , 04:05  | 100                            | II, IV, V                        | No                      |
| 17                                                              | 15  | F   | 10:01 , 15:01  | 1.27                           | II, IV                           | Yes                     |
| 18                                                              | 13  | M   | 12:01 , 15:01  | 9.28                           | II, III, IV, VIII                | Yes                     |
| <b>Milk Allergic Children under the age of ≤ 8</b>              |     |     |                |                                |                                  |                         |
| 19                                                              | 4   | M   | 10:01 , 15:01  | 77.2                           | I, II, IV, V                     | No                      |
| 20                                                              | 3   | M   | 04:01 , 10:01  | 0.8                            | III, IV, VII                     | Yes                     |
| 21                                                              | 5   | F   | 07:01, 11:01   | 51.7                           | II, IV , V                       | No                      |
| 22                                                              | 3   | M   | 03:01 , 07:01  | 22.7                           | I, II, IV                        | Yes                     |
| 23                                                              | 3   | M   | 03:01, 07:01   | 7.3                            | II, IV                           | No                      |
| 24                                                              | 5   | M   | 09:01, 10:01   | 52.2                           | III, IV                          | No                      |
| 25                                                              | 5   | M   | 01:01, 15:01   | 2.86                           | IV                               | No                      |
| 26                                                              | 8   | M   | 04:01 , 07:01  | 15.3                           | II, III, IV, V                   | No                      |
| <b>Non-atopic subjects</b>                                      |     |     |                |                                |                                  |                         |
| 27                                                              | 29  | M   | 03:01 , 15:01  | 0                              | Absent                           | Yes                     |
| 28                                                              | 31  | F   | 01:01 , 15:01  | 0                              | Absent                           | Yes                     |
| 29                                                              | 34  | F   | 01:01 , 01:03  | 0                              | Absent                           | Yes                     |
| 30                                                              | 34  | F   | 03:01 , 11:01  | 0                              | Absent                           | Yes                     |
| 31                                                              | 35  | F   | 04:01 , 14:01  | 0                              | Absent                           | Yes                     |
| 32                                                              | 32  | F   | 07:01 , 07:01  | 0                              | Absent                           | Yes                     |
| 33                                                              | 38  | M   | 04:01 , 04:01  | 0                              | Absent                           | Yes                     |
| 34                                                              | 37  | F   | 03:01 , 07:01  | 0                              | Absent                           | Yes                     |
| 35                                                              | 32  | M   | 01:01 , 04:02  | 0                              | Absent                           | Yes                     |
| 36                                                              | 35  | M   | 07:01 , 13:02  | 0                              | Absent                           | Yes                     |

|                                             |    |   |               |   |        |     |
|---------------------------------------------|----|---|---------------|---|--------|-----|
| <b>37</b>                                   | 24 | M | 07:01 , 13:02 | 0 | Absent | Yes |
| <b>38</b>                                   | 3  | M | 01:01,        | 0 | Absent | Yes |
| <b>39</b>                                   | 23 | F | 15:01 , 10:01 | 0 | Absent | Yes |
| <b>Atopic subjects without milk allergy</b> |    |   |               |   |        |     |
| <b>40*</b>                                  | 8  | M | 10:01 , 15:01 | 0 | Absent | Yes |
| <b>41*</b>                                  | 12 | M | 01:01 , 13:02 | 0 | Absent | Yes |
| <b>42*</b>                                  | 10 | F | 07:01 , 11:01 | 0 | Absent | Yes |
| <b>43*</b>                                  | 12 | M | 11:01 , 15:01 | 0 | Absent | Yes |
| <b>44*</b>                                  | 10 | F | 01:01 , 15:01 | 0 | Absent | Yes |

- I* Itchy mouth, lips and / or pharynx
  - II* Abdominal discomfort and / or diarrhea
  - III* Nausea or vomiting
  - IV* Severe skin itching or hives, acute or angioedema
  - V* Rhinitis and / or conjunctivitis and / or respiratory compromise
  - VI* Dizziness (feeling loss of consciousness)
  - VII* Syncope (loss of consciousness)
  - VIII* Desaturation with respiratory compromise
- \* Subjects also had history of peanut or walnut and positive IgE ImmunoCAP for peanut or walnut



**Figure E1.** Tetramer Guided Epitope Mapping (TGEM) studies of DRB1\*10:01-restricted Bos d-specific CD4<sup>+</sup> T-cells. **A**, PBMC from a DRB1\*10:01 subject with milk allergy were stimulated with 5 pools of Bos d 11 peptides for 2 weeks and subsequently stained with corresponding DRB1\*10:01/Bos d 11 pooled peptide tetramers. **B**, Cells that were stimulated with pool #1 were re-stained with individual peptides from the corresponding pool. The staining identified p4 (Bos d 11<sub>25-44</sub>) as DRB1\*10:01 restricted Bos d 11 T-cell epitopes.

**Figure E2.** Frequencies of milk allergen reactive CD4<sup>+</sup> T-cells. **A**, and **B**, Frequencies of  $\beta$ -lactoglobulin-,  $\alpha$ <sub>s</sub>1-casein-,  $\alpha$ <sub>s</sub>2-casein-,  $\beta$ -casein- and  $\kappa$ -casein-reactive T-cells in 8 subjects with milk allergy (adults, teenagers and children >8 years of age n=6; children  $\leq$ 8 years of age n=2) with CD154 assays after 3 hour Bos d peptide stimulation utilizing freshly isolated PBMC. Each data point represents the frequency of T-cells reactive to each allergen. An ANOVA test (with Bonferroni correction) was used to compare all columns in the statistical analysis. \*\*\* $P$ <0.001, NS. Not significant.

**Figure E3.** Phenotypes of CCR6<sup>+</sup>Bos d-specific T-cells in milk allergic subjects after *ex vivo* pMHC-II tetramer enrichment utilizing freshly isolated PBMC. **A**, and **B**, Tetramer<sup>+</sup>CD45RA<sup>-</sup> T-cells were gated against CCR4 and CCR6. Each data point represents results for surface expression in tetramer positive T-cells from 23 subjects with milk allergy; 15 adults, teenagers and children >8 years of age (triangles) and 8 children  $\leq$ 8 years of age (downside triangles) with CMA. **C**, and **D**, Tetramer positive CD45RA<sup>-</sup> T-cells were gated against CCR6 and CRTH2. Each data point represents results for surface expression in tetramer positive T-cells from 26 subjects with milk allergy; 18 adults, teenagers and children >8 years of age (triangles) and 8 children  $\leq$ 8 years of age (downside triangles) with CMA. A Student *t* test was used in the statistical analysis. \*\*\*\* $P$ <0.0001, \* $P$ <0.05, NS. Not significant.

**A.**

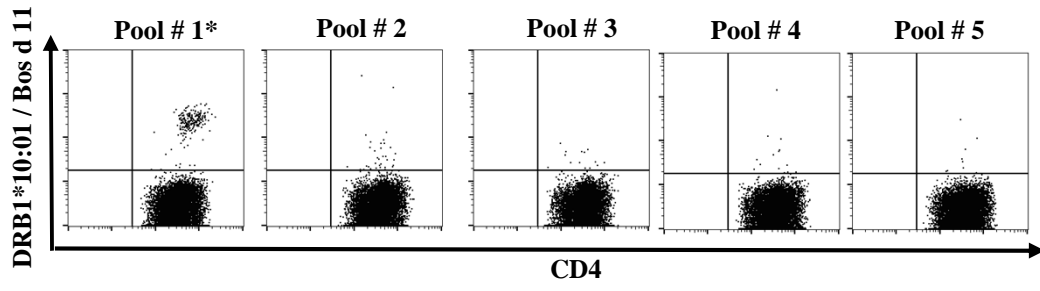

**B.**

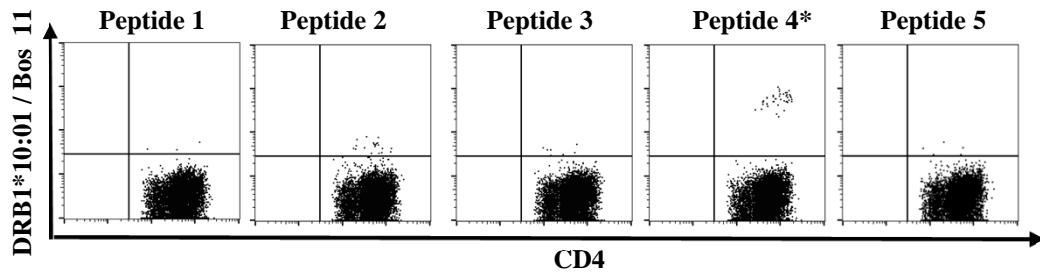

**Fig. E1**

A.

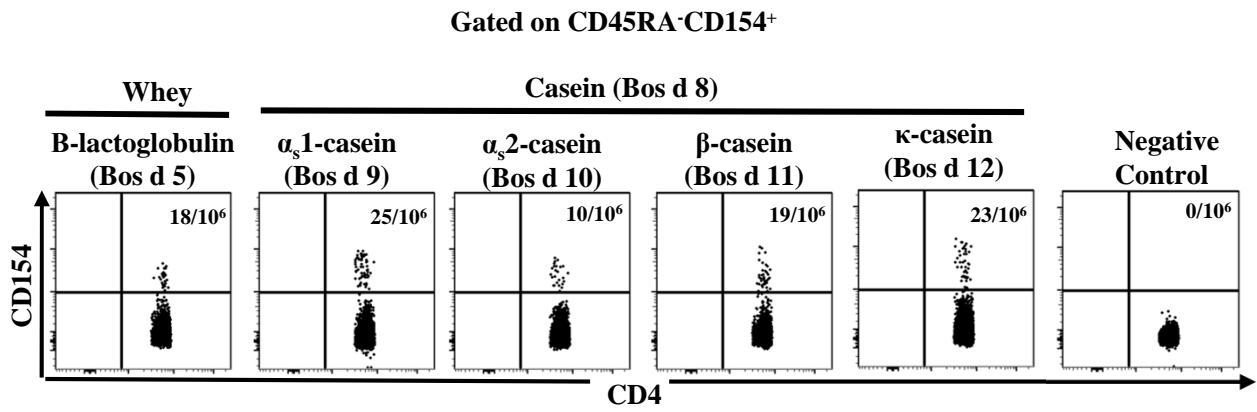

B.

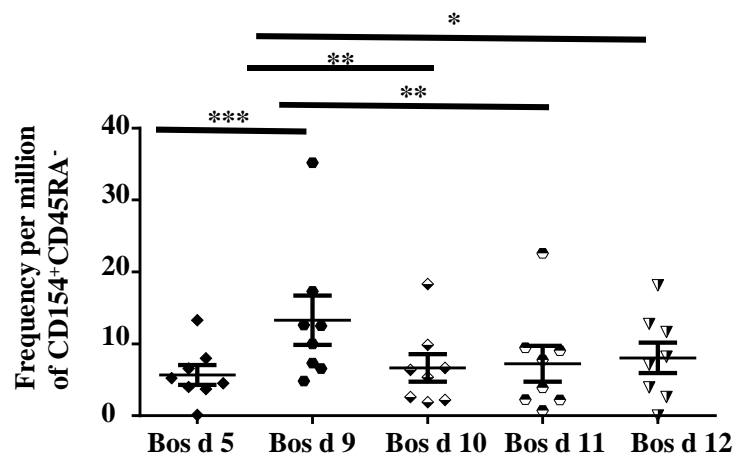

Fig. E2

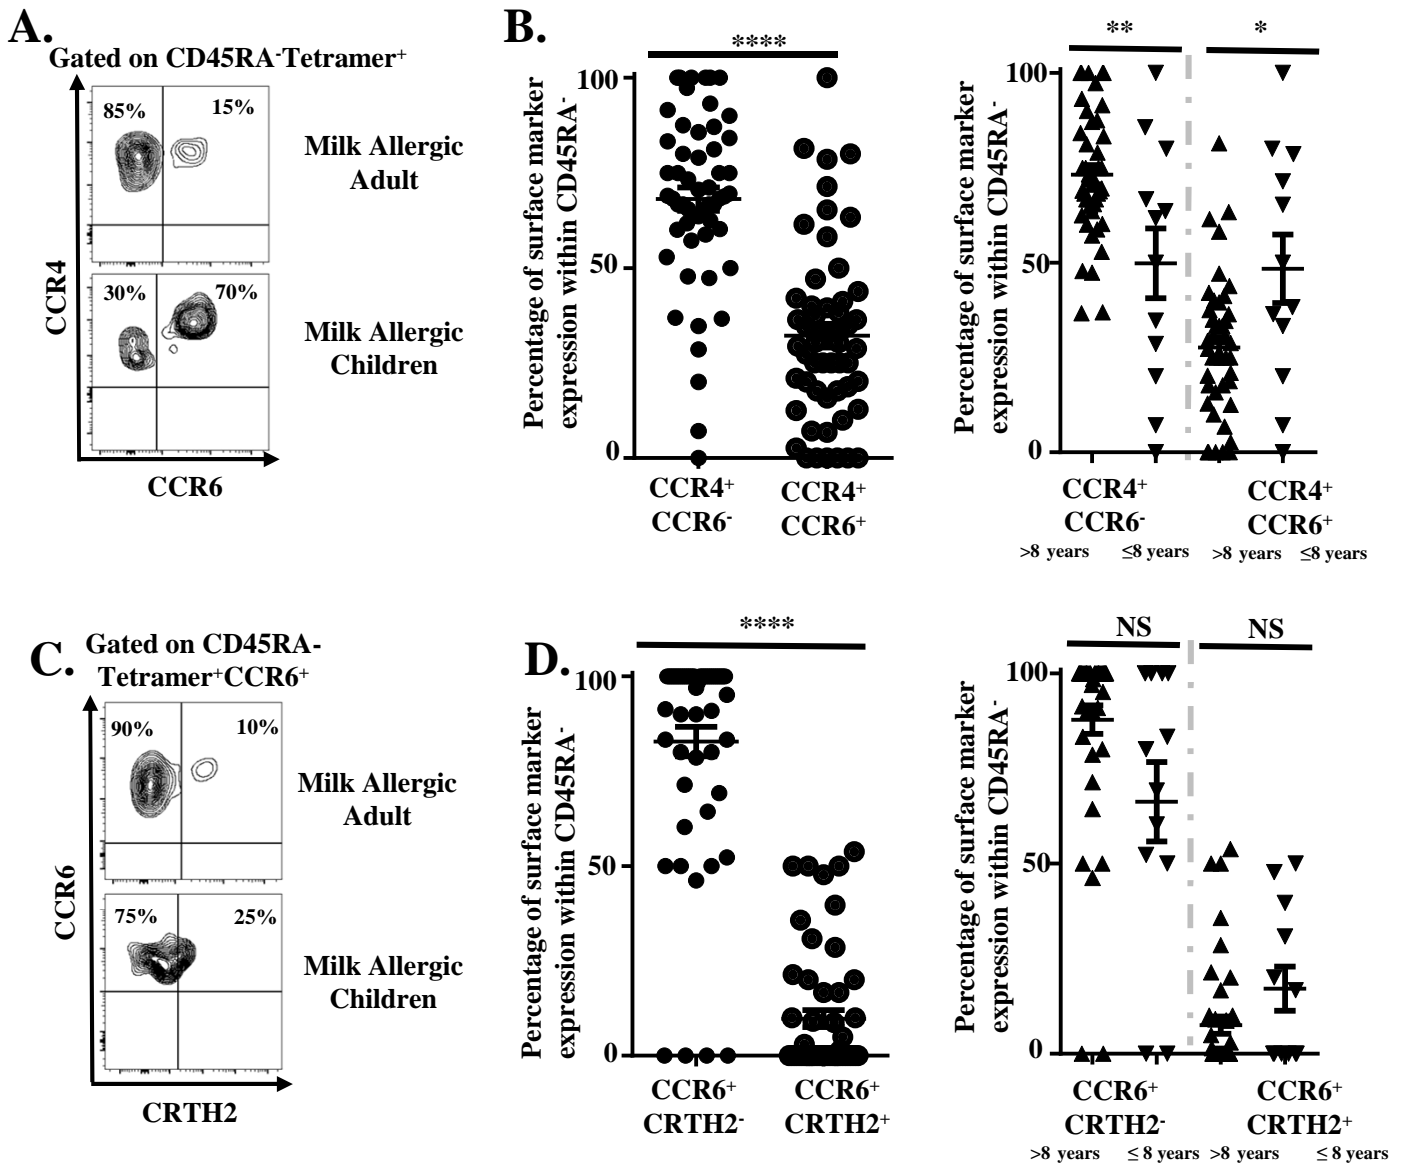

**Fig. E3**
